# Supplementary material for: Reduction in mRNA Expression of the Neutrophil Chemoattract Factor CXCL1 in Pseudomonas aeruginosa Treated Barth Syndrome B Lymphoblasts
Source: MDPI journal article supplement (doi:10.3390/biology12050730), 2023-05-16

**Supplementary Figure S1.** Representative flow cytometry images of surface markers expressed in untreated and *Pseudomonas aeruginosa* treated control and BTHS lymphoblasts.

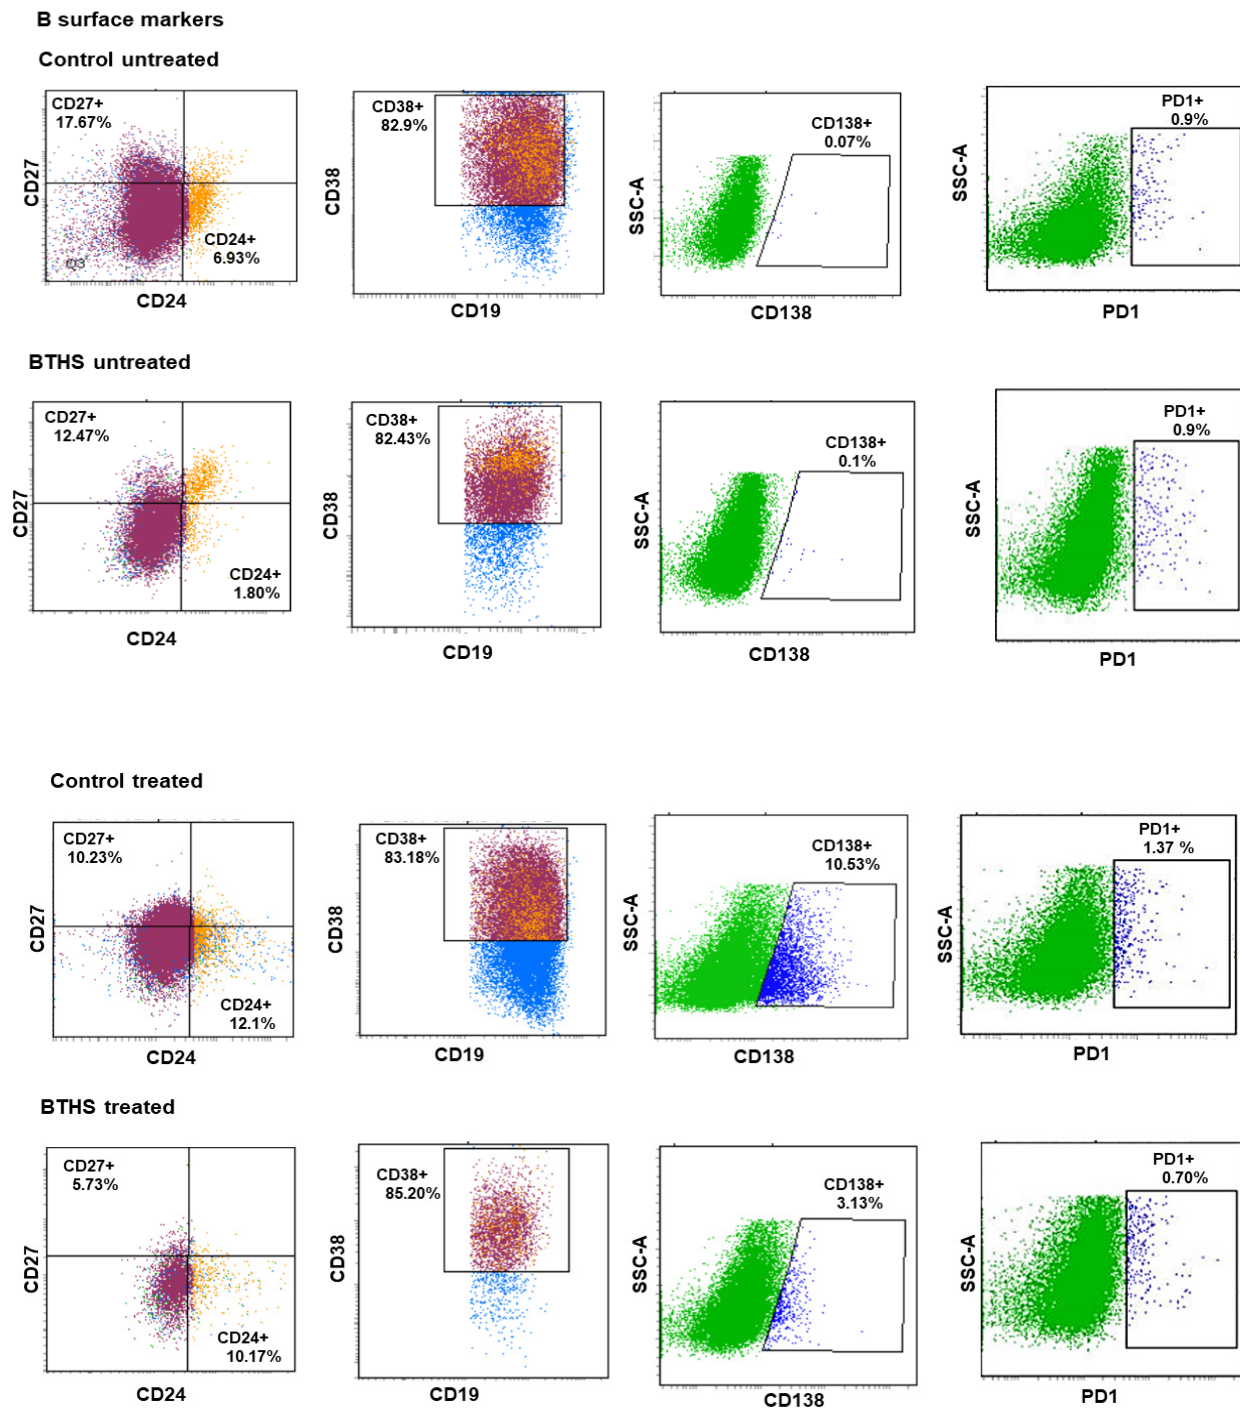

Supplement: s1 [file s1]
